# Supplementary material for: Hidden in plain sight: what remains to be discovered in the eukaryotic proteome?
Source: PubMed Central journal article supplement (PMC6395881; doi:10.1098/rsob.180241), 2019-02-20

# 410 FISSION YEAST CONSERVED PROTEINS OF UNKNOWN BIOLOGICAL ROLE

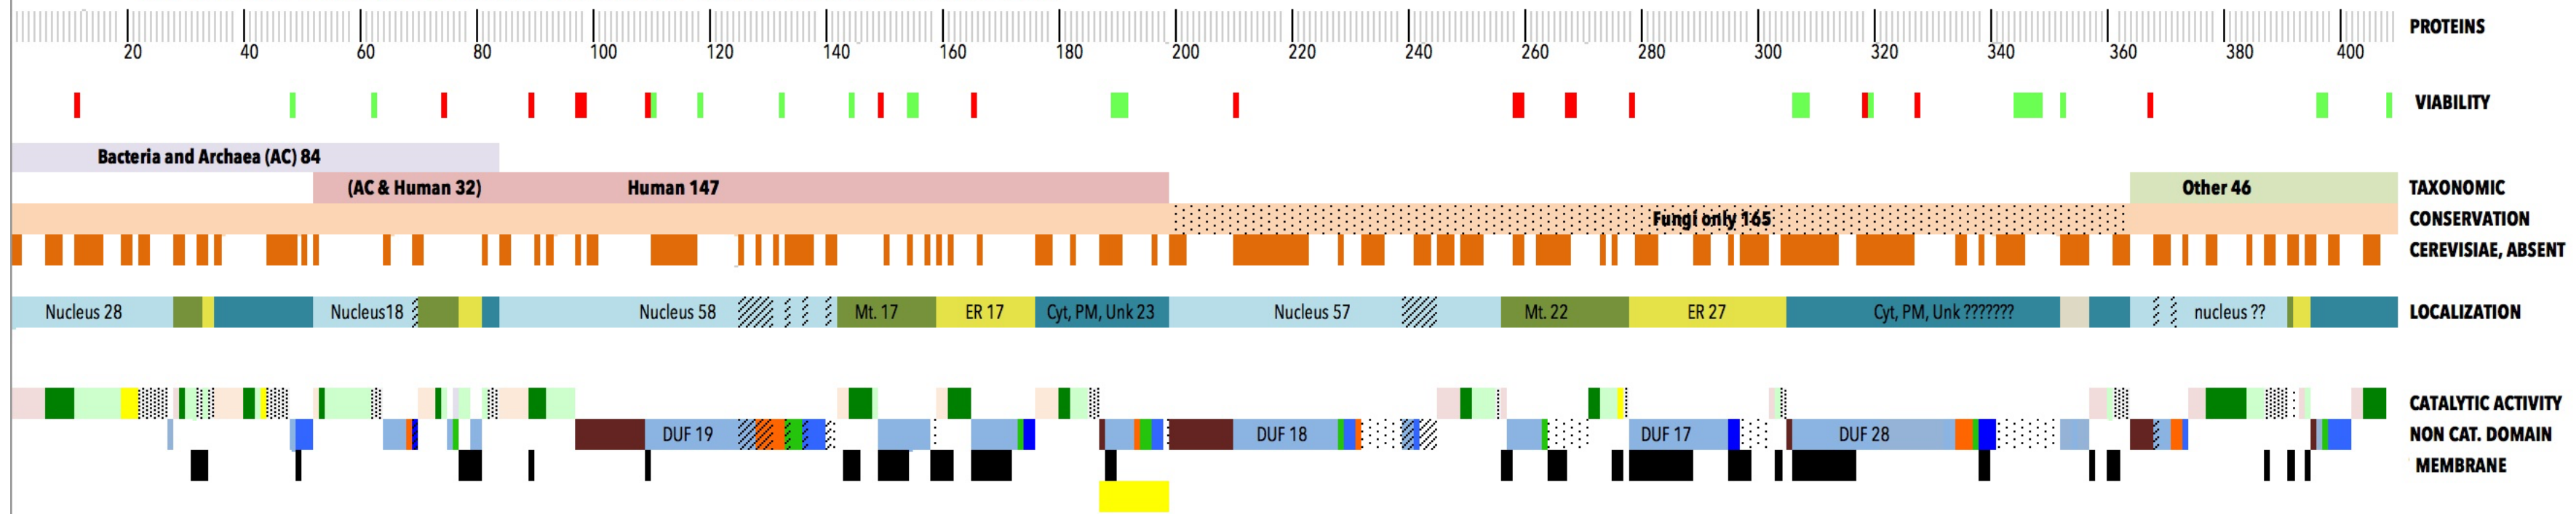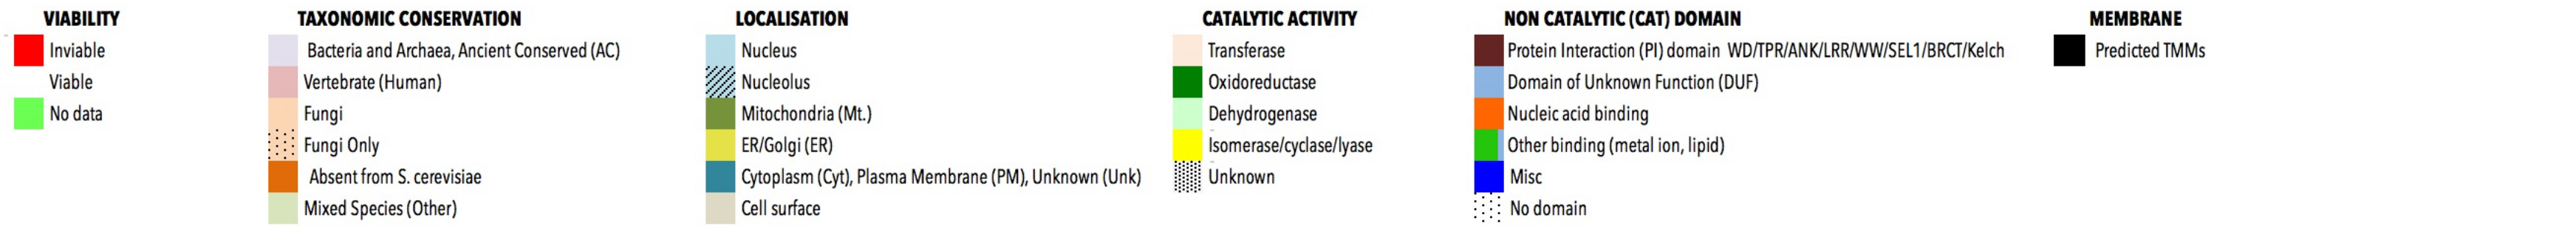

Supplement: rsob180241supp1.pdf [file rsob180241supp1.pdf]
